# Supplementary material for: VACCIMEL, an allogeneic melanoma vaccine, efficiently triggers T cell immune responses against neoantigens and alloantigens, as well as against tumor-associated antigens
Source: Frontiers journal article supplement (doi:10.3389/fimmu.2024.1496204), 2025-01-07
Supplement: Table_2.xlsx [file Table_2.xlsx]

## Sheet: Supplementary Table 7
	Method	AUC ROC	AUC ROC 0.1	AUC ROC 0.2	AUC Precision Recall	Spearman correlation	Spearman correlation (p value)	Pearson Correlation	Pearson Correlation (p value)
1	TCGA SKCM mRNA expression (log2 fold change)	0.6305	0.5399	0.5441	0.5068	0.163	0.0266	0.103	0.163
2	VACCIMEL mRNA expression (log2 fold change)	0.6034	0.5405	0.5466	0.4857	0.111	0.1326	0.0982	0.1837
3	NetMHCpan binding affinity (nM)	0.5928	0.4796	0.4721	0.3059	-0.0898	0.2242	-0.0852	0.2486
4	Promiscuity strong binders	0.5917	0.5145	0.5384	0.4494	0.1435	0.0514	0.122	0.098
5	NetMHCpan Rank BA	0.5831	0.4808	0.4657	0.311	-0.058	0.4331	0.0531	0.4725
6	Peptide Harmonic mean Best Rank	0.5754	0.5107	0.5109	0.3576	-0.031	0.6752	0.0208	0.7784
7	VACCIMEL mRNA expression (TPM)	0.5701	0.5369	0.5369	0.4566	0.1108	0.1333	0.2322	0.0015
8	NetMHCpanExp VACCIMEL	0.57	0.4968	0.4966	0.3312	-0.0571	0.4399	-0.0407	0.5826
9	IMPROVE simple	0.5683	0.513	0.5094	0.4309	0.0769	0.2981	0.0291	0.6942
10	MHCflurry presentation	0.5648	0.5101	0.5205	0.4133	0.0995	0.1777	0.0269	0.716
11	VACCIMEL mRNA expression x RNA VAF	0.5646	0.5431	0.5561	0.4778	0.1037	0.1602	0.2488	0.0006
12	PropBasic	0.5644	0.5223	0.539	0.4247	0.0802	0.2778	0.0798	0.2802
13	MixMHCpred Rank	0.5638	0.4872	0.4792	0.3329	-0.046	0.5342	0.1017	0.1683
14	MHCflurry processing	0.5632	0.5029	0.5102	0.4174	0.1095	0.1378	0.1241	0.0923
15	Molecular weight	0.5631	0.5117	0.5191	0.4458	0.072	0.3304	0.0817	0.2688
16	TCGA SKCM mRNA expression (TPM)	0.5623	0.5215	0.5415	0.4516	0.1174	0.1115	0.2002	0.0063
17	Promiscuity weak binders	0.5622	0.5116	0.5233	0.4247	0.1183	0.1089	0.0588	0.4266
18	PRIME Rank	0.5613	0.4923	0.4698	0.3219	-0.0439	0.5533	-0.015	0.8391
19	Sheet	0.5584	0.5156	0.5432	0.4186	0.1483	0.0439	0.1598	0.0298
20	NetMHCpanExp TCGA	0.5493	0.5015	0.5071	0.3478	-0.0435	0.5563	0.0393	0.5951
21	Aromaticity	0.5442	0.5034	0.5028	0.4083	0.0609	0.4103	0.1185	0.1082
22	NetMHCpan Rank EL	0.5434	0.5032	0.5114	0.3586	0.0154	0.8352	0.0611	0.4089
23	PropAro	0.5431	0.5053	0.5013	0.3953	0.0916	0.2151	0.129	0.08
24	Molar extinction coefficient oxidized	0.5425	0.4991	0.5066	0.3937	0.0425	0.5658	0.0432	0.5593
25	Molar extinction coefficient reduced	0.5417	0.5007	0.5093	0.3957	0.0434	0.5576	0.0434	0.5573
26	Helix	0.5325	0.4983	0.4985	0.375	0.0983	0.183	0.0461	0.5337
27	Variant proportion in RNAseq	0.5214	0.5319	0.5511	0.4846	0.0765	0.3009	0.1863	0.0111
28	IEDB immunogenicity	0.52	0.5044	0.5104	0.4017	0.0799	0.2795	0.1112	0.1319
29	Peptide length	0.5182	0.494	0.4873	0.426	0.0322	0.6639	0.0261	0.7247
30	ProteaSMM immunoproteasome	0.5164	0.4899	0.4828	0.3613	0.0602	0.4159	0.035	0.6358
31	NetMHCstabpan Thalf (h)	0.5106	0.4944	0.4998	0.3668	0.0066	0.9289	0.0055	0.9405
32	HydroCore	0.509	0.4934	0.4971	0.3672	0.0307	0.6783	-0.0566	0.4441
33	PropAcidic	0.5071	0.4914	0.4866	0.3577	0.0998	0.1764	0.1481	0.0442
34	TAP SMM	0.5069	0.4959	0.4875	0.3604	-0.0083	0.9108	-0.045	0.543
35	Kernel self similarity	0.5027	0.5455	0.5293	0.447	0.05	0.4991	0.1972	0.0071
36	Kernel self similarity non anchor	0.502	0.4999	0.4998	0.674	0.0189	0.798	0.0215	0.7718
37	Gravy	0.4925	0.4748	0.4779	0.3453	0.0555	0.453	0.0041	0.956
38	HydroAll	0.4924	0.4748	0.4779	0.3453	0.0554	0.4537	0.0041	0.9563
39	ProteaSMM constitutive	0.4857	0.4814	0.4765	0.3403	0.0306	0.6788	0.0499	0.4997
40	Instability index	0.4779	0.5031	0.501	0.3555	-0.0877	0.2353	-0.1253	0.0893
41	Dissimilarity	0.4549	0.4855	0.4704	0.3142	-0.0716	0.3328	-0.0157	0.8323
42	Isoelectric point	0.4519	0.5114	0.5171	0.3768	-0.1508	0.0405	-0.1844	0.012
43	ICERFIRE Rank	0.451	0.5653	0.5589	0.4974	0.1004	0.1741	0.2148	0.0033
44	Turn	0.4462	0.489	0.4694	0.3363	-0.1163	0.115	-0.1014	0.1696
45	NetMHCstabpan Rank	0.438	0.5291	0.5443	0.4531	0.1135	0.1239	0.206	0.0049
46	Expression in healthy melanocytes (nTPM)	0.436	0.5005	0.4974	0.3563	-0.0679	0.3581	0.1862	0.0112
47	Promiscuity weak binders wild type	0.4314	0.5045	0.5254	0.4424	0.1303	0.0772	0.1499	0.0417
48	PropSmall	0.4272	0.4839	0.4642	0.3234	-0.1126	0.1269	-0.1225	0.0967
49	Mismatches	0.427	0.4868	0.4824	0.1929	-0.3525	0	-0.4586	0
50	NetMHCpan Rank EL wild type	0.4225	0.4971	0.5006	0.3328	-0.1485	0.0437	-0.1492	0.0426
51	Foreignness	0.4214	0.4998	0.4934	0.3252	-0.1453	0.0484	-0.0642	0.3854
52	MHCflurry affinity	0.4181	0.5021	0.4917	0.3303	-0.0798	0.2805	-0.0432	0.559
53	Promiscuity strong binders wild type	0.4101	0.5552	0.5754	0.555	0.2425	0.0009	0.2845	0.0001
